# Supplementary material for: Hydrothermal synthesis and photoluminescent properties of stacked indium sulfide superstructures
Source: Royal Society of Chemistry journal article supplement (doi:10.1039/b717512d), 2008-01-01
Supplement: b717512d.pdf [file b717512d.pdf]

## Electronic Supplementary Information

### Hydrothermal Synthesis and Photoluminescent Properties of Stacked Indium Sulfide Superstructures

Yan Xing,<sup>a,b</sup> Hongjie Zhang,\*<sup>a</sup> Shuyan Song,<sup>a</sup> Jing Feng,<sup>a</sup> Yongqian Lei,<sup>a</sup> Lijun

Zhao,<sup>a</sup> Weidong Shi<sup>a</sup> and Meiye Li<sup>a</sup>

<sup>a</sup> Key Laboratory of Rare Earth Chemistry and Physics, Changchun Institute of Applied Chemistry, Chinese Academy of Sciences, Changchun 130022, P. R. China  
Fax: +86-431-85698041 ; Tel : +86-431-85262127 ; E-mail: [hongjie@ns.ciac.jl.cn](mailto:hongjie@ns.ciac.jl.cn)

<sup>b</sup> Department of Chemistry, Northeast Normal University, Changchun 130024, P. R. China

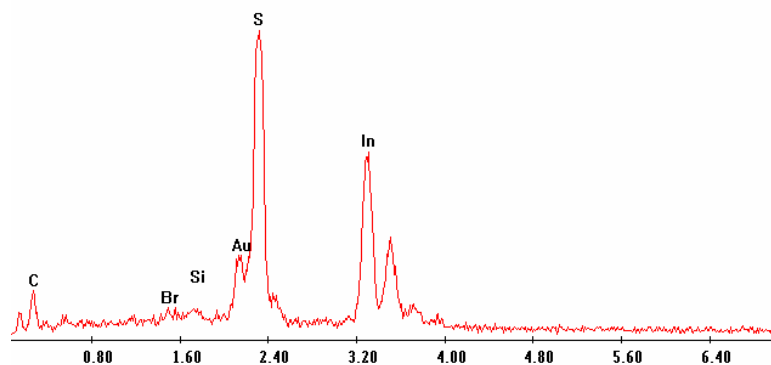

**Fig. S1** EDX spectrum of  $\text{In}_2\text{S}_3$  stacked superstructures.

FT-IR spectrum shows weak bands at  $2915$  and  $2841\text{cm}^{-1}$  which are associated with asymmetric and symmetric methylene C-H stretches vibration, respectively. The band at  $1463\text{cm}^{-1}$  arises from  $-\text{CH}_3$  deformation and  $-\text{CH}_2$  scissoring vibrations, while band at  $723\text{cm}^{-1}$  is assigned to rocking vibration of methylene, suggesting that surfactant CTAB molecules remain strongly associated with the  $\text{In}_2\text{S}_3$  crystals even after extensive washing.

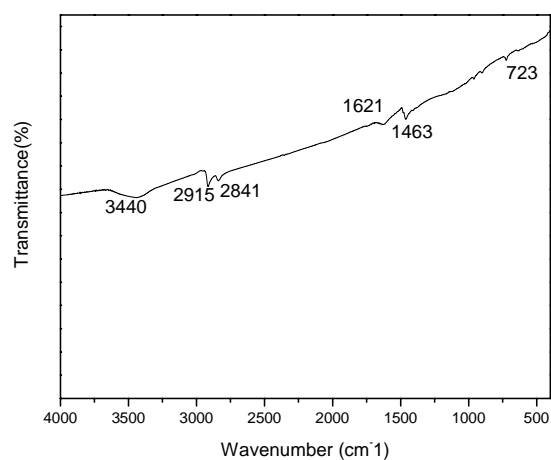

**Figure S2.** IR spectrum of the  $\beta\text{-In}_2\text{S}_3$  nanostructures.

To depict the nature of the prepared  $\text{In}_2\text{S}_3$  sample, thermogravimetric analysis (TGA) was carried out. TGA shows two distinct weight-loss steps in the temperature range of 20-600°C, the first step in the region 20-450°C corresponds to the removal of the organic surfactant of CTAB. Subsequent weight loss of 14.53% occurs between 450-600 °C, which is approximately equal to the ideal weight loss of 14.72% when  $\text{In}_2\text{S}_3$  is oxidized into  $\text{In}_2\text{O}_3$  in air. The weight -loss process ceases at 550° C, and the stable residue can reasonably be ascribed to  $\text{In}_2\text{O}_3$ .

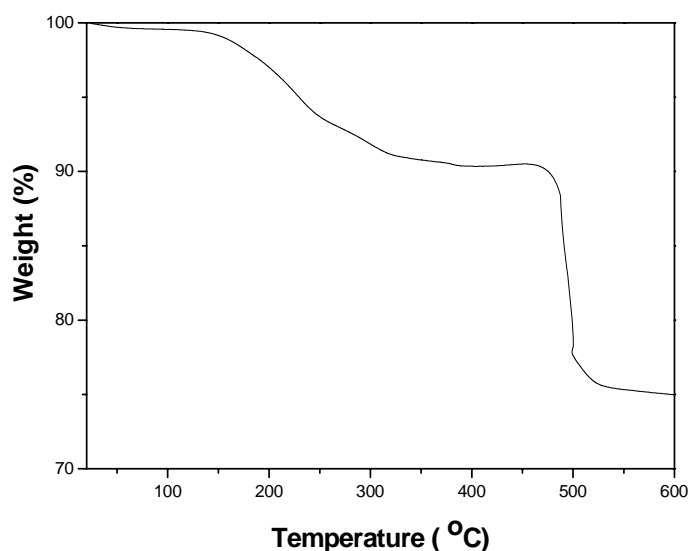

**Figure S3.** TGA curve of the prepared  $\text{In}_2\text{S}_3$  sample.

The effect of hydrothermal temperature on the final morphology was investigated. Fig. S4 shows FE-SEM images of the samples prepared at different temperatures for 7 h. At 100°C, the SEM image shows that the as-prepared samples are of cubic morphology of micrometer scale as shown in Fig. S4a. EDX pattern indicates that the cubic crystals are  $\text{In}(\text{OH})_3$ , suggesting that thiourea did not decompose at this low temperature. Increasing the reaction temperature to 120°C, the mixtures of cubic  $\text{In}(\text{OH})_3$  and stacked structures of  $\text{In}_2\text{S}_3$  composed of nanoflakes were observed (Fig. S4b), indicating thiourea began to react with  $\text{H}_2\text{O}$  at this temperature to produce  $\text{H}_2\text{S}$ , and to result in the conversion of cubic  $\text{In}(\text{OH})_3$  to  $\text{In}_2\text{S}_3$  stacks partly. And prolonging the reaction time to 24 h at this temperature, only stacked  $\text{In}_2\text{S}_3$  composed of nanoflakes can be observed. Further increasing the reaction temperature to 180 °C,

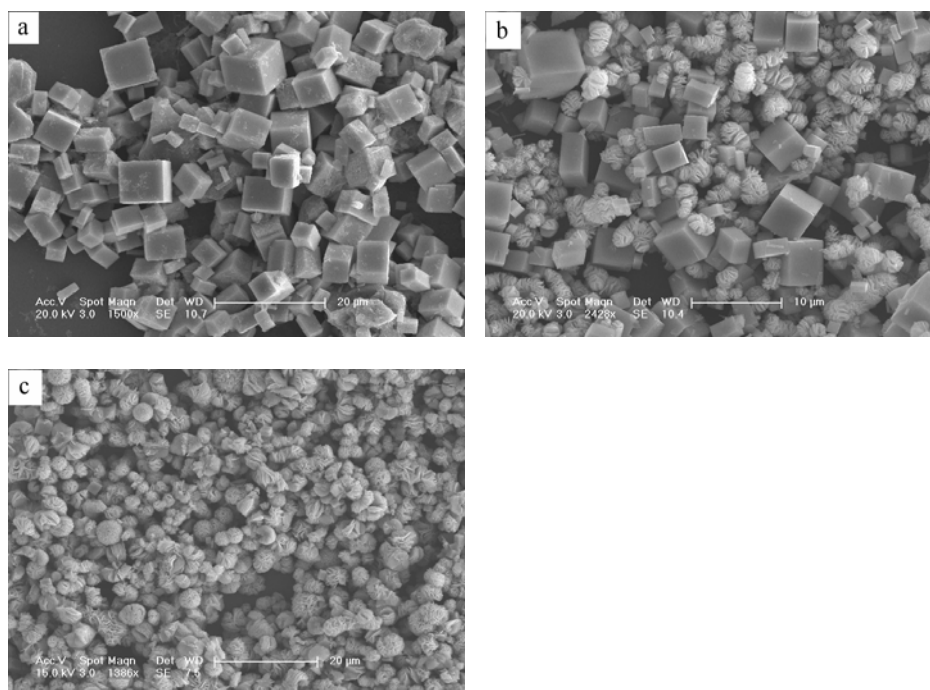

**Fig. S4** FE-SEM images of the products under different hydrothermal temperatures for 7 h: (a) 100 °C, (b) 120 °C, (c) 180 °C

$\text{In}_2\text{S}_3$  micropompons composed of nanoflakes became the main products (Fig. S4c).

From the above results we can conclude that 140 °C is the optimum temperature for the formation of stacked  $\text{In}_2\text{S}_3$  superstructures.

In order to investigate the influence of CTAB and /or thiourea on the formation of  $\text{In}_2\text{S}_3$  stacked structures, the following experiments were performed. The first experiment was carried out using  $\text{Na}_2\text{S}$  instead of thiourea as the sulfur source while keeping other reaction conditions the same. As a result, only nanoparticles of various shapes were obtained (Fig. S5). The main reason is likely to be that the reaction rate of  $\text{In}(\text{OH})_3$  and  $\text{S}^{2-}$  is too fast under this reaction condition. Other experiments were carried out by using an appropriate dosage of Sodium bis(2-ethylhexyl) sulfosuccinate (AOT) or sodium dodecyl sulfate (SDS) as the template instead of CTAB, thus only microspheres (Fig. S6) or irregular polyhedra (Fig. S7) were observed by FETEM when AOT and SDS acting as “soft template”, respectively. In a control experiment, without the addition of CTAB, there was no well-defined hierarchical stacks, but

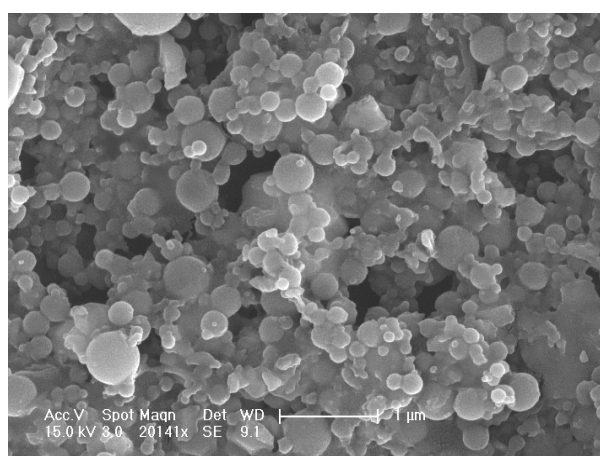

**Figure S5.** FE-SEM image of the as-synthesized  $\text{In}_2\text{S}_3$  nanoparticles with  $\text{Na}_2\text{S}$  as sulfur source instead of thiourea.

rather nanoflowers composed of nanoflakes were found (Fig. S8). Based on the outcomes of above experiments, we believe that both thiourea as sulfur source and surfactant CTAB are indispensable for the formation of stacked superstructures of  $\beta$ - $\text{In}_2\text{S}_3$ .

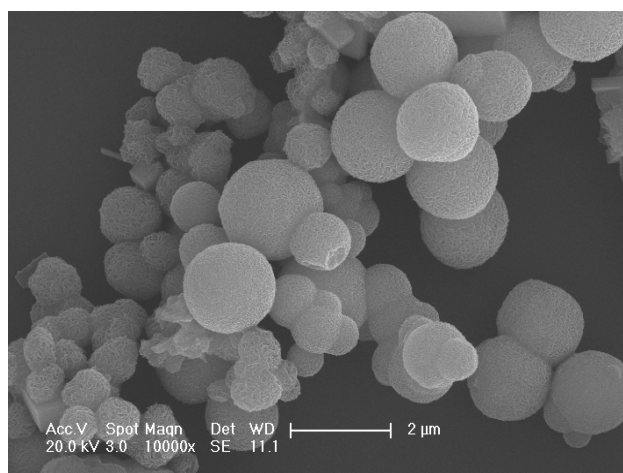

**Figure S6.** FE-SEM image of the as-synthesized  $\text{In}_2\text{S}_3$  microspheres in the presence of AOT as template.

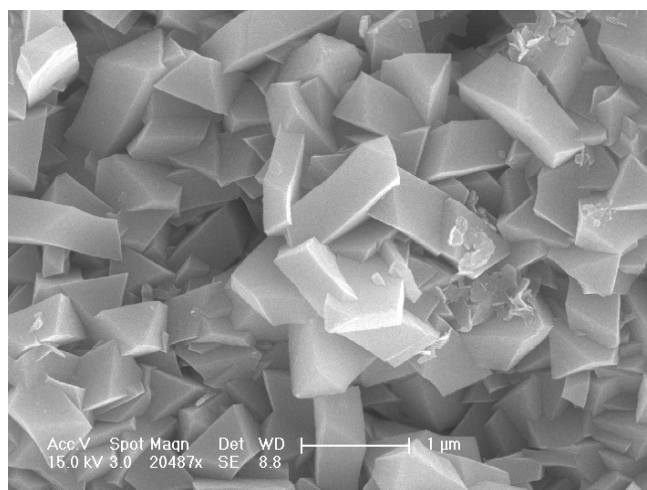

**Figure S7.** FE-SEM image of the as-synthesized  $\text{In}_2\text{S}_3$  irregular polyhedra in the presence of SDS as template.

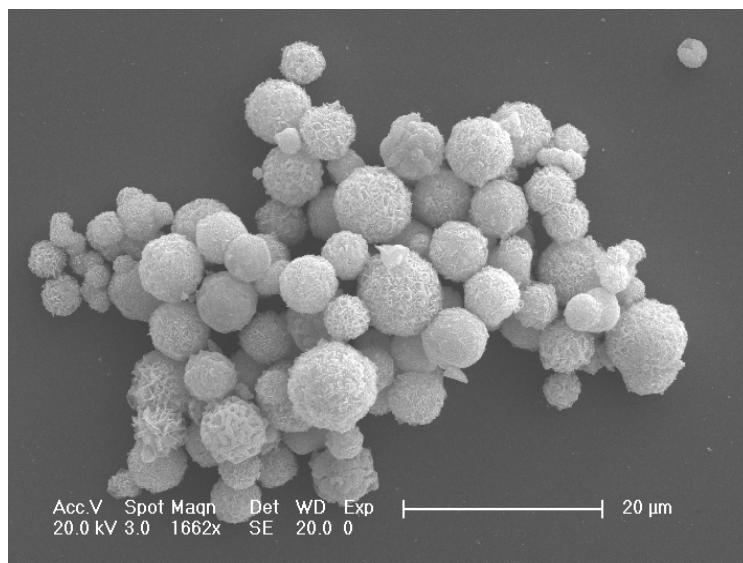

**Figure S8.** FE-SEM image of the as-synthesized  $\text{In}_2\text{S}_3$  nanoflowers without any surfactants.

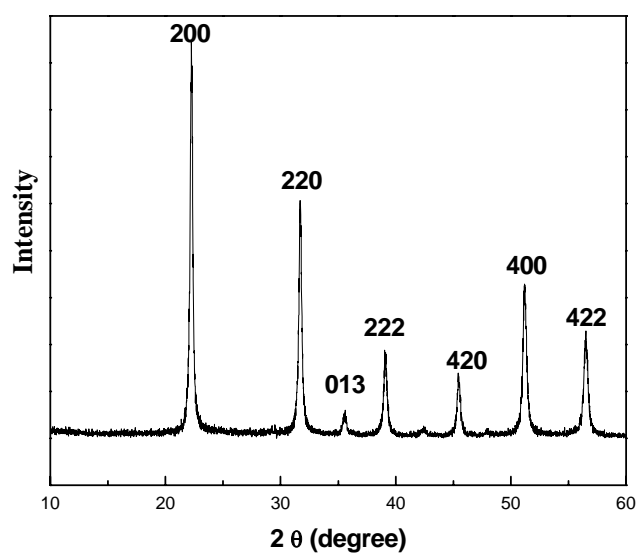

**Figure S9.** XRD pattern of  $\text{In}(\text{OH})_3$  nanorod bundles.
